# Supplementary material for: PT-Flax (phenotyping and TILLinG of flax): development of a flax (Linum usitatissimum L.) mutant population and TILLinG platform for forward and reverse genetics
Source: PubMed Central journal article supplement (PMC3853753; doi:10.1186/1471-2229-13-159), 2013-10-15

Kill curve

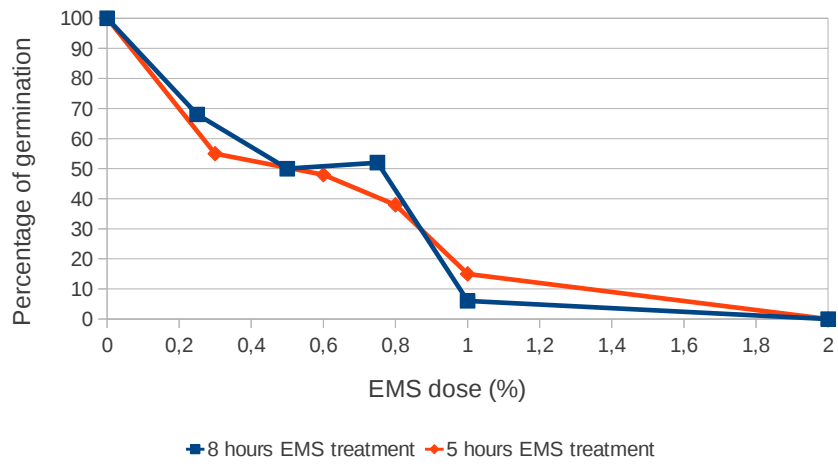

Supplement: 1471-2229-13-159-S1.pdf [file 1471-2229-13-159-S1.pdf]
